# Supplementary material for: Upconversion Nanoparticle-Based Förster Resonance Energy Transfer for Detecting DNA Methylation
Source: Sensors (Basel). 2016 Aug 9;16(8):1259. doi: 10.3390/s16081259 (PMC5017424; doi:10.3390/s16081259)
Supplement: Supplementary file 1 [file sensors-16-01259-s001.pdf]

# Supplementary Materials: Upconversion Nanoparticle-Based Förster Resonance Energy Transfer for Detecting DNA Methylation

Seockjune Kim, Sang-Hyun Hwang, Su-Gyeong Im, Min-Ki Lee, Chang-Hun Lee, Sang Jun Son and Heung-Bum Oh

**Table S1.** Detection of methylation in lung cancer tissue samples (n = 49).

| Sample No. | MSP      | MS-UC-FRET Ratio | RQ-PCR (C <sub>T</sub> ) | Pyrosequencing (%) |
|------------|----------|------------------|--------------------------|--------------------|
| 1          | negative | 0.97             | undetected               | 4.1                |
| 2          | positive | 1.24             | undetected               | 5.1                |
| 3          | positive | 1.49             | 31.8                     | 6.5                |
| 4          | positive | 1.21             | 32.4                     | 5.5                |
| 5          | negative | 0.92             | undetected               | 3.0                |
| 6          | positive | 1.31             | 34.9                     | 5.6                |
| 7          | positive | 1.54             | 38.1                     | 4.5                |
| 8          | positive | 1.10             | undetected               | 3.9                |
| 9          | negative | 0.88             | undetected               | 3.7                |
| 10         | positive | 1.43             | 29.9                     | 9.1                |
| 11         | positive | 1.64             | 26.9                     | 39.0               |
| 12         | negative | 0.92             | undetected               | 2.8                |
| 13         | positive | 1.15             | undetected               | 3.0                |
| 14         | positive | 1.47             | undetected               | 3.7                |
| 15         | negative | 1.00             | undetected               | 2.6                |
| 16         | positive | 1.16             | undetected               | 2.6                |
| 17         | positive | 1.41             | undetected               | 3.4                |
| 18         | positive | 1.52             | 27.5                     | 60.5               |
| 19         | negative | 1.06             | undetected               | 2.1                |
| 20         | negative | 1.06             | undetected               | 3.9                |
| 21         | positive | 1.54             | 28.0                     | 36.1               |
| 22         | positive | 1.43             | undetected               | 4.3                |
| 23         | positive | 1.46             | undetected               | 3.1                |
| 24         | positive | 1.61             | 28.0                     | 47.6               |
| 25         | positive | 1.28             | undetected               | 4.1                |
| 26         | positive | 1.50             | undetected               | 5.0                |
| 27         | positive | 1.36             | undetected               | 4.0                |
| 28         | positive | 1.47             | undetected               | 5.1                |
| 29         | positive | 1.46             | 27.0                     | 77.8               |
| 30         | positive | 1.34             | undetected               | 3.9                |
| 31         | positive | 1.76             | 28.1                     | 33.8               |
| 32         | positive | 1.40             | undetected               | 7.9                |
| 33         | positive | 1.79             | 29.0                     | 36.0               |
| 34         | positive | 1.49             | 39.6                     | 5.0                |
| 35         | positive | 1.65             | undetected               | 3.9                |
| 36         | positive | 1.62             | undetected               | 3.9                |
| 37         | positive | 2.18             | 28.0                     | 47.74              |

Table S1. Cont.

| Sample No. | MSP      | MS-UC-FRET Ratio | RQ-PCR (C <sub>T</sub> ) | Pyrosequencing (%) |
|------------|----------|------------------|--------------------------|--------------------|
| 38         | positive | 1.33             | undected                 | 3.22               |
| 39         | positive | 1.29             | undected                 | 2.96               |
| 40         | positive | 1.43             | undected                 | 5.21               |
| 41         | positive | 1.23             | undected                 | 4.13               |
| 42         | positive | 1.38             | undected                 | 5.56               |
| 43         | positive | 1.45             | undected                 | 5.26               |
| 44         | negative | 1.11             | undected                 | 5.42               |
| 45         | positive | 2.09             | 27.8                     | 55.79              |
| 46         | positive | 1.02             | undected                 | 5.71               |
| 47         | positive | 1.26             | undected                 | 5.15               |
| 48         | positive | 1.34             | undected                 | 6.29               |
| 49         | positive | 1.16             | undected                 | 6.63               |
